# Supplementary material for: An automated method to detect and quantify fungiform papillae in the human tongue: Validation and relationship to phenotypical differences in taste perception
Source: PubMed Central journal article supplement (PMC5766753; doi:10.1016/j.physbeh.2017.12.003), 2018-02-01
Supplement: mmc1.pdf [file mmc1.pdf]

```

clear all
close all
clc

filename = uigetfile({'*.jpg;*.tif;*.png;*.gif','All Image Files';...
    '*.*','All Files' },'Choose Image');

C = imread(filename);

happy=0;

while happy == 0

    close all

    figure(1), imshow(C), title('Tongue')

    prompt={'Enter initial types of tongue to be analysed'};
    name = 'Tongue analysis';
    defaultans = {'3'};
    answer = inputdlg(prompt,name,[1 60],defaultans);
    ncolours = str2double(answer);

    while ncolours <=0 || ncolours > 5

        prompt={'Enter initial types of tongue to be analysed between 1 and
5'};
        name = 'Tongue analysis';
        defaultans = {'3'};
        answer = inputdlg(prompt,name,[1 60],defaultans);
        ncolours = str2double(answer);

    end

    for i = 1:ncolours

        [tongue_pap{i},xi(:,1,i),yi(:,1,i)] = roipoly(C);

    end

    region = [xi,yi];

    [m,no,~] = size(region);

    region_coordinates = region(1:m-1,,:);

    coord = region_coordinates;

    sample_regions = false([size(C,1) size(C,2) ncolours]);

    for count = 1:ncolours
        sample_regions(:, :, count) = roipoly(C, coord(:,1, count), ...
            coord(:,2, count));
    end
end

```

```

end

cform = makecform('srgb2lab');
lab_tongue = applycform(C,cform);

a = lab_tongue(:,:,2);
b = lab_tongue(:,:,3);
colour_markers = zeros([ncolours, 2]);

for count = 1:ncolours
    colour_markers(count,1) = mean2(a(sample_regions(:,:,count)));
    colour_markers(count,2) = mean2(b(sample_regions(:,:,count)));
end

colour_labels = 0:ncolours-1;
a = double(a);
b = double(b);
distance = zeros([size(a), ncolours]);

for count = 1:ncolours
    distance(:,:,count) = ( (a - colour_markers(count,1)).^2 + ...
        (b - colour_markers(count,2)).^2 ).^0.5;
end

[~, label] = min(distance,[],3);
label = colour_labels(label);
clear distance;

rgb_label = repmat(label,[1 1 3]);
segmented_images = repmat(uint8(0),[size(C), ncolours]);

scrsz = get(groot,'ScreenSize');
figure('OuterPosition',[1 1 scrsz(3) scrsz(4)]);

for count = 1:ncolours
    colour = C;
    colour(rgb_label ~= colour_labels(count)) = 0;
    segmented_images(:,:,count) = colour;

    if ncolours <= 4
        subplot(2,2,count)
        imshow(segmented_images(:,:,count));
        title(['Type ',num2str(count)])
    elseif ncolours > 4 && ncolours <= 6
        subplot(3,2,count)
        imshow(segmented_images(:,:,count));
        title(['Type ',num2str(count)])
    end
end

prompt={'Are you happy with these images? Yes=1 No=0'};
name = 'Repeat?';
defaultans = {'1'};
answer = inputdlg(prompt,name,[1 60],defaultans);
happy = str2double(answer);

```

```

while happy <0 || happy > 1

    prompt={'Are you happy with these images? Yes=1 No=0'};
    name = 'Repeat?';
    defaultans = {'1'};
    answer = inputdlg(prompt,name,[1 60],defaultans);
    happy = str2double(answer);

end

end

%% resolve tongue again

% happy=0; this here taken out because sometimes Sally is happy
j = no +1;

while happy == 0

    prompt={'Please enter the number of the image that you wish to resolve
again: '};
    name = 'Choose image number';
    defaultans = {'1'};
    answer = inputdlg(prompt,name,[1 80],defaultans);
    vall = str2double(answer);

    while vall <= 0 || vall > ncolours

        prompt={'Please enter the number of the image that you wish to
resolve again: '};
        name = 'Choose image number';
        defaultans = {'1'};
        answer = inputdlg(prompt,name,[1 80],defaultans);
        vall = str2double(answer);

    end

    image = segmented_images(:, :, :, vall);

    figure(j); imshow(image)

    prompt={'Enter number of types of tongue to be analysed'};
    name = 'Tongue analysis';
    defaultans = {'2'};
    answer = inputdlg(prompt,name,[1 60],defaultans);
    ncolours1 = str2double(answer);

    while ncolours1 < 2 || ncolours1 >= 3

        prompt={'Enter number of types of tongue to be analysed (2 is
recommended) '};
        name = 'Choose image number';
        answer = inputdlg(prompt,name,[1 80]);

```

```

    ncolours1 = str2double(answer);

end

types = zeros(1,ncolours1);

for i = 1:ncolours1

    [tongue_pap1{i},xi(:,1,i),yi(:,1,i)] = roipoly(image);

    types(i) = i;

end

region = [xi,yi];

[m,~,~] = size(region);

region_coordinates = region(1:m-1,:,:)

coord = region_coordinates;

sample_regions = false([size(image,1) size(image,2) ncolours1]);

for count = 1:ncolours1
    sample_regions(:,:,count) = roipoly(image,coord(:,1,count),...
        coord(:,2,count));
end

cform = makecform('srgb2lab');
lab_tongue = applycform(image,cform);

a = lab_tongue(:,:,2);
b = lab_tongue(:,:,3);
colour_markers = zeros([ncolours1, 2]);

for count = 1:ncolours1
    colour_markers(count,1) = mean2(a(sample_regions(:,:,count)));
    colour_markers(count,2) = mean2(b(sample_regions(:,:,count)));
end

colour_labels = 0:ncolours1-1;
a = double(a);
b = double(b);
distance = zeros([size(a), ncolours1]);

for count = 1:ncolours1
    distance(:,:,count) = ( (a - colour_markers(count,1)).^2 + ...
        (b - colour_markers(count,2)).^2 ).^0.5;
end

[~, label] = min(distance,[],3);
label = colour_labels(label);

```

```

clear distance;

rgb_label = repmat(label,[1 1 3]);
segmented_images1 = repmat(uint8(0),[size(C), ncolours1]);

figure(j+1)
scrsz = get(groot, 'ScreenSize');
set(groot, 'DefaultFigurePosition',[1 1 scrsz(3) scrsz(4)]);

for count = 1:ncolours1
    colour = image;
    colour(rgb_label ~= colour_labels(count)) = 0;
    segmented_images1(:, :, :, count) = colour;

    if ncolours1 <= 2
        subplot(2,1,count)
        imshow(segmented_images1(:, :, :, count));
        title(['Type ', num2str(count)])
    elseif ncolours1 > 2 && ncolours1 <= 4
        subplot(2,2,count)
        imshow(segmented_images1(:, :, :, count));
        title(['Type ', num2str(count)])
    end
end

prompt={'Are you happy with these images? Yes=1 No=0'};
name = 'Repeat?';
defaultans = {'1'};
answer = inputdlg(prompt,name,[1 60],defaultans);
happy = str2double(answer);

while happy <0 || happy > 1

    prompt={'Are you happy with these images? Yes=1 No=0'};
    name = 'Repeat?';
    defaultans = {'1'};
    answer = inputdlg(prompt,name,[1 60],defaultans);
    happy = str2double(answer);

end

end

%% choose rectangle from original image to replace with rectangle
%% from cleaner image

% happy=0;this here taken out because sometimes Sally is happy

while happy == 0

    prompt={'Choose the number of the image that you wish to replace an area
of the original image with'};
    name = 'Choose image';
    defaultans = {'1'};

```

```

answer = inputdlg(prompt,name,[1 60],defaultans);
val2 = str2double(answer);

while val2 <0 || val2 > ncolours1

    prompt={'Choose the number of the image that you wish to replace an
area of the original image with'};
    name = 'Choose image';
    defaultans = {'1'};
    answer = inputdlg(prompt,name,[1 60],defaultans);
    val2 = str2double(answer);

end

k = j+2;

adjusted_image = segmented_images(:,:,val1);
tip = segmented_images1(:,:,val2);

figure(k), imshow(adjusted_image)

powertoggle = uicontrol('Style','togglebutton','String','Proceed',...
    'Position',[10 10 40 40],'Value',1);

[m,n,p] = size(adjusted_image);

rect = imrect(gca);

while get(powertoggle,'Value')==get(powertoggle,'Max')

    pause(0.01)

end

pos = getPosition(rect);
% [xmin ymin width height]

xmin = round(pos(1));
ymin = round(pos(2));

width = round(pos(3));
height = round(pos(4));

xmax = xmin + width;
ymax = ymin + height;

if xmin<0 || xmax>n || ymin<0 || ymax>m
    disp('not okay')
else
    disp('okay')
end

while xmin<0 || xmax>n || ymin<0 || ymax>m

```

```

set(powertoggle, 'Value', 1);

while get(powertoggle, 'Value')==get(powertoggle, 'Max')

    pause(0.01)

end

pos = getPosition(rect);

xmin = round(pos(1));
ymin = round(pos(2));

width = round(pos(3));
height = round(pos(4));

xmax = xmin + width;
ymax = ymin + height;

pause(0.01)

end

%% splice image together for papillae

for i = ymin:ymax
    for ij = xmin:xmax

        adjusted_image(i,ij,1) = tip(i,ij,1);
        adjusted_image(i,ij,2) = tip(i,ij,2);
        adjusted_image(i,ij,3) = tip(i,ij,3);

    end
end

scrsz = get(groot, 'ScreenSize');
figure(k+1)
set(groot, 'DefaultFigurePosition', [1 1 scrsz(3) scrsz(4)]);

subplot(2,1,1), imshow(adjusted_image)
subplot(2,1,2), imshow(C);

prompt={'Are you happy with this image? Yes=1 No=0'};
name = 'Repeat?';
defaultans = {'1'};
answer = inputdlg(prompt,name,[1 60],defaultans);
happy = str2double(answer);

while happy < 0 || happy > 1

```

```

    prompt={'Are you happy with this image? Yes=1 No=0'};
    name = 'Repeat?';
    defaultans = {'1'};
    answer = inputdlg(prompt,name,[1 60],defaultans);
    happy = str2double(answer);

end

end

%% rejected papillae leftover from the rectangle, treated as base tongue

if(~happy)
    for i = 1:ncolours1

        otherchoices(i) = i;

end

        otherchoices(val2) = 0;

        [row,col,v] = find(otherchoices);

        tipextra = segmented_images1(:,:,v);

        matrix = zeros(m,n,p,'uint8');

        j = k+2;

        for i = ymin:ymax
            for ij = xmin:xmax

                matrix(i,ij,1) = tipextra(i,ij,1);
                matrix(i,ij,2) = tipextra(i,ij,2);
                matrix(i,ij,3) = tipextra(i,ij,3);

            end

        end

end

end

%% thresholding

if(~happy)
    segmented_images(:,:,v,1) = adjusted_image;
else
    [m,n,p,n4] = size(segmented_images);
    matrix = zeros(m,n,p,'uint8');
    val1=1; % Default value if it all works!
end

happy = 0;

```



```

% segmented_images(:,:,:,vall) = adjusted_image;
% keyboard
scrsz = get(groot,'ScreenSize');
figure('OuterPosition',[1 1 scrsz(3) scrsz(4)]);

all_images = zeros(m,n,p,(ncolours+1),'uint8');

for i = 1:ncolours

    all_images(:,:,:,i) = segmented_images(:,:,:,i);

end

all_images(:,:,:,i+1) = matrix;

if ncolours <=3 && ncolours > 0

    for i = 1:ncolours+1
        subplot(2,2,i), imshow(all_images(:,:,:,i))
        title(['Type ',num2str(i)]);
    end

elseif ncolours > 3 && ncolours <= 5

    for i = 1:ncolours+1
        subplot(3,2,i), imshow(all_images(:,:,:,i))
        title(['Type ',num2str(i)]);

    end

end

while happy==0

    k = j+1;

    num = 1;

    prompt={'Please enter a threshold value for the minimum size of papillae
in pixels'};
    name = 'Threshold?';
    defaultans = {'40'};
    answer = inputdlg(prompt,name,[1 80],defaultans);
    threshold = str2double(answer);

    for i = 1:num

        prompt={'Please enter the number of the image that you wish to
threshold from most recent subplot '};
        name = 'Choose image number';
        defaultans = {'1'};

```

```

answer = inputdlg(prompt,name,[1 80],defaultans);
val = str2double(answer);

while val > ncolours+1 || val <= 0

    prompt={'Please enter the number of the image that you wish to
threshold '};
    name = 'Choose image number';
    defaultans = {'1'};
    answer = inputdlg(prompt,name,[1 80],defaultans);
    val = str2double(answer);

end

choices(i) = val;

figure(k)

rgb_papillae = all_images(:,:, :,val);
p_gray = rgb2gray(rgb_papillae);
p_thes =bwareaopen(p_gray,threshold);
subplot(num,1,i), imshow(p_thes)

end

prompt={'Are you happy with this? Yes=1 No=0'};
name = 'Repeat?';
defaultans = {'1'};
answer = inputdlg(prompt,name,[1 60],defaultans);
happy = str2double(answer);

end

%%
j = k;

for i = 1 : ncolours+1
    rgb_papillae = all_images(:,:, :,i);
    p_gray= rgb2gray(rgb_papillae);
    p_thes=bwareaopen(p_gray,threshold);

    [B,L] = bwboundaries(p_thes,'noholes');

    hold on
    for k = 1:length(B)
        boundary = B{k};

        stats = regionprops(L,'Area');
        statsp_c = struct2cell(stats);

        values{i} = statsp_c;

    end
end

```

```

end

%% calculating areas and densities

species_number = zeros(ncolours+1,1);

% for i = 1:ncolours+1 -- check in correction mode!
for i = 1:size(values,2)

    z = values{1,i};
    zdouble = cell2mat(z);
    sumz(i) = sum(zdouble);
    [~,species_number(i)] = size(zdouble);

end
for i = 1:num

    disp(['Total number of papillae is
',num2str(species_number(choices(i)))]);

end

totalpixels = sum(sumz);
[m1,n1] = size(choices);

for i = 1:n1

    density(i) = sumz(choices(i))/totalpixels;

end

pap_density = sum(density);

disp(['The papillae density is ',num2str(pap_density)]);

% up to 26/07/16 fixed little bugs and adjusted imrect code

%% Areas of the papillae are given in the values{1,i} cell

% assume circular, therefore A = pi * r^2

pap_areas = cell2mat(values{1,vals1});

[~,n2] = size(pap_areas);

pap_radii = sqrt(pap_areas/pi);

pap_diameters = pap_radii*2;

figure(j);

```

```

mvp = ceil(max(pap_diameters));

x = linspace(0, mvp, 81);

subplot(2,1,1)
hist = histogram(pap_diameters,x);
xlabel('diameters');
ylabel('frequency');
title('Diameters - whole tongue')

mvp1 = ceil(max(pap_areas));
x1 = linspace(0,mvp1,81);

subplot(2,1,2)
hist1 = histogram(pap_areas,x1);
title('Areas - whole tongue')

counts = hist.Values;

happy = 0;

while happy ==0

    prompt={'Are you happy with this image? Yes=1 No=0'};
    name = 'Repeat?';
    defaultans = {'1'};
    answer = inputdlg(prompt,name,[1 60],defaultans);
    happy = str2double(answer);

    while happy <0 || happy > 1

        prompt={'Are you happy with this image? Yes=1 No=0'};
        name = 'Repeat?';
        defaultans = {'1'};
        answer = inputdlg(prompt,name,[1 60],defaultans);
        happy = str2double(answer);

    end

end

%% GriddingCode2.m

papillae_image = all_images(:, :, :, 1);

num1 = 2;

image = zeros(m,n,p,num1,'uint8');
imageC = zeros(m,n,p,num1,'uint8');

value1 = round(linspace(1,n,num1+1));

```

```

k = j;
k = k+1;
figure(k);

for i = 1:num1

    for j = value1(i):value1(i+1)

        image(:,j,:,i) = papillae_image(:,j,:);
        imageC(:,j,:,i) = C(:,j,:);

    end

    subplot(num1,1,i), imshow(image(:, :, :, i));
    title(['Side ', num2str(i)]);

end

%%
%
prompt={'Choose number of vertical sections'};
name = 'Number of sections';
defaultans = {'4'};
answer = inputdlg(prompt,name,[1 60],defaultans);
num2 = str2double(answer);

while num2 <1 || num2 > 8

    prompt={'Choose number of vertical sections'};
    name = 'Number of sections';
    defaultans = {'4'};
    answer = inputdlg(prompt,name,[1 60],defaultans);
    num2 = str2double(answer);

end

prompt={'Choose number of horizontal subsections'};
name = 'Number of subsections';
defaultans = {'2'};
answer = inputdlg(prompt,name,[1 60],defaultans);
input1 = str2double(answer);

while input1 <1 || input1 > 5

    prompt={'Choose number of horizontal subsections'};
    name = 'Number of subsections';
    defaultans = {'2'};
    answer = inputdlg(prompt,name,[1 60],defaultans);
    input1 = str2double(answer);

end

%%

```

```

sides = 2;

image2 = zeros(m,n,p,num2,sides,'uint8');
image2C = zeros(m,n,p,num2,sides,'uint8');

value2 = round(linspace(1,m,num2+1));

for input = 1:sides

    for i = 1:num2

        for j = value2(i):value2(i+1)

            image2(j,:::,i,input) = image(j,:::,input);
            image2C(j,:::,i,input) = imageC(j,:::,input);

        end

    end

    imageR21 = zeros(m,n,p,input1,sides,'uint8');
    imageR21C = zeros(m,n,p,input1,sides,'uint8');

    for i = 1:num2

        [~,col,~] = find(image2C(:,:,1,i,input));

        left(input) = min(col);
        right(input) = max(col);

        xpap(i,::,input) = round(linspace(left(input),right(input),input1+1));

    end

end

imagesgrid = zeros(m,n,p,input1*num2,sides,'uint8');
imagesgridC = zeros(m,n,p,input1*num2,sides,'uint8');

for input = 1:sides
    counter = 0;
    k = k+1;
    figure(k);

    for i = 1:num2

        y = xpap(i,::,input);

        imageR21 = zeros(m,n,p,input1,sides,'uint8');
        imageR21C = zeros(m,n,p,input1,sides,'uint8');
    end
end

```

```

for l = 1:input1

    for j = y(l):y(l+1)

        imageR21(:,j,:,l,input) = image2(:,j,:,i,input);
        imageR21C(:,j,:,l,input) = image2C(:,j,:,i,input);
    end

    counter = counter+1;

    imagesgrid(:,:,counter,input) = imageR21(:,:,counter,input);
    subplot(num2,input1,counter),
imshow(imagesgrid(:,:,counter,input))
    title(['Side ',num2str(input),' Grid ',num2str(counter)])

    imagesgridC(:,:,counter,input) = imageR21C(:,:,counter,input);
end

end

[m,n,p,number,si] = size(imagesgrid);

for i = 1 : number
    rgb_papillae = imagesgrid(:,:,i,input);
    p_gray= rgb2gray(rgb_papillae);
    p_thes=bwareaopen(p_gray,threshold);

    [B,L] = bwboundaries(p_thes,'noholes');

    for ki = 1:length(B)
        boundary = B{ki};

        stats = regionprops(L,'Area');
        statsp_c = struct2cell(stats);

        papvalues{input,i} = statsp_c;
    end

end

end

%%

sumzgrid = zeros(sides,number);
species_number_grid = zeros(sides,number);
mean_radri = zeros(sides,number);

for input = 1:sides

    for i = 1:number

        zgrid = papvalues{input,i};

```

```

zdoublegrid = cell2mat(zgrid);
sumzgrid(input,i) = sum(zdoublegrid);
[~,species_number_grid(input,i)] = size(zdoublegrid);

disp(['Number of papillae in area ',num2str(i),' on side
',num2str(input),' is ',num2str(species_number_grid(input,i))]);

pap_radii_grid = sqrt(zdoublegrid/pi);
pap_diameters_grid = pap_radii_grid*2;

diameters{input,i} = pap_diameters_grid;

mean_radii(input,i) = mean(pap_radii_grid);

disp(['Mean radius in area ',num2str(i),' on side ',num2str(input),'
is ',num2str(mean_radii(input,i))]);

end

[row2,col2] = find(species_number_grid(input,:));
infocol{input} = col2;

[~,max1(input)] = size(infocol{1,input});

end

gridsizes = zeros(2,counter);
densitygrid = zeros(2,counter);

for input = 1:sides

for i=1:counter

kC{input,i} = find(imagesgridC(:, :, 1, i, input));

[gridsizes(input,i),~] = size(kC{input,i});

densitygrid(input,i) = sumzgrid(input,i)/gridsizes(input,i);

end

end

%%

% want to save densitygrid variable

for input = 1:sides

sizeplot = max1(input);
% xcol = infocol{1,input};

```



```

inf = infocol{1,input};

for i = 1:sizeplot

    histgrid = ceil(max(diameters{input,inf(i)}));
    x = linspace(0, histgrid, 15);

    %         histarea = ceil(max(cell2mat(papvalues{input,i})));
    %         x1 = linspace(0, histarea, 15);

    %         inf = infocol{1,input};
    %         info = inf(i);

    figure;
    hist = histogram(diameters{input,i},x);
    xlabel('diameters');
    ylabel('frequency')
    title(['Side ',num2str(input),' Grid ',num2str(inf(i))])

    %         figure;
    %         hist1 = histogram(papvalues{input,i},x1);
    %         xlabel('Areas');
    %         ylabel('frequency')
    %         title(['Side ',num2str(input),' Grid ',num2str(info)])

end
end

%%

save('pqfile.mat','papvalues','diameters','densitygrid','sumzgrid','gridsizes
')
```
